# Supplementary material for: Ecology, floristic-vegetational features and future perspectives of spruce forests affected by Ips typographus: insights from the Southern Alps
Source: Research Square preprint supplement (doi:10.21203/rs.3.rs-5878691/v1), 2025-01-28
Supplement: Supplementary file 1 [file 7b2a72bf7640c4ee31531249.xlsx]

## Sheet: P
Sampling area (code)	Forest condition	T - Index					K - Index					L - Index					F - Index					R - Index					N - Index					H - Index					D - Index
		Mean	SD	t-value	P-value		Mean	SD	t-value	P-value		Mean	SD	t-value	P-value		Mean	SD	t-value	P-value		Mean	SD	t-value	P-value		Mean	SD	t-value	P-value		Mean	SD	t-value	P-value		Mean	SD	t-value	P-value
1	Affected by bark beetle	3.44036	0.132029	10.6047	0.000448	**	2.81788	0.128988	-2.39682	0.074613	ns	2.88927	0.0388667	59.7925	<0.00001	**	2.99777	0.0089553	2.41181	0.073411	ns	2.91659	0.0863787	-3.3896	0.02754	*	3.72325	0.180485	7.18443	0.001988	**	3.05551	0.0506387	-41.6631	<0.00001	**	2.40745	0.469897	-2.13152	0.100037	ns
	Unaffected by bark beetle	2.58968	0.043274				2.99645	0.00371626				1.11617	0.0335783				2.98328	0.00530404				3.09238	0.0246535				2.96873	0.0226626				4.88202	0.056582				2.9859	0.0117593
2	Affected by bark beetle	2.95599	0.129468	5.44475	0.005526	**	2.93541	0.10308	-1.5268	0.201519	ns	2.20626	0.239211	6.01834	0.003839	**	2.89359	0.160603	-0.64265	0.555434	ns	2.72082	0.344735	-0.24766	0.816593	ns	2.7996	0.13619	0.08963	0.932887	ns	4.11541	0.240411	-5.57323	0.005079	**	2.31831	0.0937659	-2.31901	0.081225	ns
	Unaffected by bark beetle	2.5419	0.0243067				3.03998	0.0587143				1.26448	0.127438				2.95582	0.0483887				2.78432	0.279951				2.79044	0.112906				4.89835	0.0375235				2.73392	0.295916
3	Affected by bark beetle	4.2364	0.266777	11.1884	0.000363	**	2.19195	0.184612	-7.55508	0.001645	**	3.79667	0.188073	24.2163	1.7e-05	**	2.17886	0.161618	-8.56804	0.001019	**	3.08235	0.0969966	-0.37752	0.724963	ns	3.08437	0.107913	1.63523	0.17734	ns	2.91255	0.220858	-16.2221	8.4e-05	**	2.97299	0.0101152	-2.79039	0.049292	*
	Unaffected by bark beetle	2.51089	0.0135955				2.99769	0.00633124				1.04516	0.0579537				2.98647	0.0230931				3.10379	0.0164018				2.97993	0.0243364				4.98841	0.0186059				2.99228	0.00640779
4	Affected by bark beetle	3.06952	0.123643	7.11982	0.002057	**	3.00863	0.0104632	0.18654	0.861098	ns	1.7716	0.922547	1.34878	0.248709	ns	3.01472	0.0810713	0.64807	0.552264	ns	2.46831	0.592289	-1.56881	0.191771	ns	2.68102	0.869038	-0.45932	0.669857	ns	4.29633	0.896558	-1.31233	0.259646	ns	2.60951	0.481647	-1.29905	0.263746	ns
	Unaffected by bark beetle	2.53519	0.0401175				3.00691	0.0120558				1.05248	0.0413446				2.98424	0.00811445				3.00856	0.0704289				2.91214	0.0656487				4.97565	0.00609293				2.97195	0.0392309
5	Affected by bark beetle	2.91611	0.0213351	9.01659	0.000838	**	3.02103	0.0412211	-0.33381	0.755291	ns	1.56178	0.315888	2.36468	0.077268	ns	2.97394	0.0220803	-0.9187	0.41024	ns	2.33416	0.343314	-2.35123	0.07841	ns	2.44503	0.472229	-1.06022	0.34882	ns	4.51278	0.403099	-1.63309	0.177788	ns	2.83881	0.116445	-1.99537	0.116732	ns
	Unaffected by bark beetle	2.59825	0.0572118				3.02918	0.00927555				1.12801	0.0341162				2.98756	0.0131055				2.83475	0.134616				2.74433	0.126809				4.89404	0.0318998				2.97892	0.0350913
6	Affected by bark beetle	3.41534	0.091211	11.0668	0.000379	**	2.1951	0.168414	-6.47015	0.00294	**	1.21102	0.106696	3.23894	0.031706	*	2.96787	0.0400444	-1.46813	0.215985	ns	2.89686	0.0895923	-4.04047	0.015598	*	2.9488	0.0875676	-0.97532	0.384628	ns	3.19132	0.138907	-12.4123	0.000242	**	2.86675	0.0540381	-4.1176	0.014641	*
	Unaffected by bark beetle	2.58745	0.0920289				2.91353	0.09287				1.0094	0.0155196				3.00191	0.00310315				3.10704	0.00956536				2.99814	0.00321731				4.81959	0.179808				2.99602	0.00606885
7	Affected by bark beetle	3.59926	0.226845	5.52415	0.005245	**	2.66436	0.103041	-1.55173	0.195674	ns	2.84715	0.227939	11.5159	0.000325	**	2.98882	0.0145677	0.21764	0.838363	ns	2.83469	0.23294	-1.49785	0.20853	ns	3.52382	0.37861	2.4572	0.069902	ns	3.3218	0.472149	-3.894	0.017631	*	1.34752	0.202827	-12.9288	0.000206	**
	Unaffected by bark beetle	2.66012	0.187745				2.86312	0.196479				1.1059	0.128968				2.9862	0.0148775				3.0406	0.0492867				2.9867	0.00198209				4.67292	0.371827				2.94095	0.0665625
8	Affected by bark beetle	3.01507	0.155837	1.44867	0.22101	ns	3.07781	0.1282	-1.77941	0.149787	ns	2.91932	0.114955	17.0011	7e-05	**	3.07863	0.0423501	7.93547	0.001365	*	3.16068	0.0680511	-1.54265	0.197784	ns	3.58081	0.190776	7.75368	0.001491	**	3.03416	0.0399468	-19.8869	3.8e-05	**	2.69152	0.152149	1.0993	0.333356	ns
	Unaffected by bark beetle	2.86186	0.0962643				3.24022	0.0925052				1.65688	0.0576824				2.84845	0.0270294				3.22322	0.0172968				2.65419	0.0803156				4.21833	0.0950849				2.56039	0.139772
9	Affected by bark beetle	3.2266	0.229209	4.7091	0.009246	**	2.93929	0.0237078	-4.14745	0.01429	*	2.70164	0.420149	5.02632	0.007353	**	3.11732	0.249509	0.92702	0.406388	ns	2.97071	0.136366	1.70624	0.163157	ns	3.66226	0.55567	2.69586	0.054327	ns	3.28987	0.45304	-5.86034	0.004232	**	2.14037	0.5694	-1.29517	0.264956	ns
	Unaffected by bark beetle	2.59502	0.037789				3.00388	0.0128623				1.37003	0.184487				2.98362	0.0122062				2.68899	0.251372				2.77091	0.138559				4.84175	0.0716161				2.6053	0.249713
10	Affected by bark beetle	2.88655	0.16709	2.46444	0.069359	ns	3.21433	0.330892	0.77475	0.481734	ns	2.63944	0.490407	4.80181	0.008637	**	2.81107	0.304197	-0.67712	0.53547	ns	2.74506	0.344093	-0.04635	0.965257	ns	3.79645	1.12758	1.64019	0.176309	ns	3.67693	0.963195	-2.10159	0.103468	ns	2.16196	0.644061	-1.88579	0.132393	ns
	Unaffected by bark beetle	2.63546	0.05677				3.06427	0.0552688				1.26711	0.0673545				2.93125	0.0444005				2.75475	0.112592				2.72618	0.0770196				4.86088	0.156099				2.86979	0.0885355
11	Affected by bark beetle	2.97268	0.118235	5.17907	0.006611	**	3.04422	0.188718	0.53573	0.620547	ns	1.85403	0.185625	5.18875	0.006567	**	2.54584	0.310138	-2.48691	0.067708	ns	2.53179	0.411128	-0.56911	0.599714	ns	2.62343	0.370592	-0.34497	0.747495	ns	4.71691	0.290653	-1.20724	0.293843	ns	2.78397	0.165619	0.75603	0.49171	ns
	Unaffected by bark beetle	2.61596	0.015906				2.98542	0.022998				1.20412	0.112291				2.99174	0.0161025				2.6878	0.237508				2.70024	0.106877				4.91969	0.0128305				2.64875	0.261795
