# Supplementary material for: Ecology, floristic-vegetational features and future perspectives of spruce forests affected by Ips typographus: insights from the Southern Alps
Source: Research Square preprint supplement (doi:10.21203/rs.3.rs-5878691/v1), 2025-01-28
Supplement: Supplementary file 2 [file 8523024101754e72e5368b58.xlsx]

## Sheet: Relevès
Sampling Area (code)	Edolo (1)		Edolo-Faeto				Sonico (2)		Sonico-Val Malga				Cevo (3)		Cevo				Saviore dell'Adamello (4)		Valle Adamè				Ceto (5)		Ceto-Val paghera				Pisogne (6)						Pisogne (7)						Colere (8)						Schilpario (9)
Forest affected/unaffected by bark beetle	Affected	B		Unaffected	NB		Affected	B		Unaffected	NB		Affected	B		Unaffected	NB		Affected	B		Unaffected	NB		Affected	B		Unaffected	NB		Affected	B		Unaffected	NB		Affected	B		Unaffected	NB		Affected	B		Unaffected	NB		Affected
Relevé code	1	2	3	4	5	6	7	8	9	10	11	12	13	14	15	16	17	18	19	20	21	22	23	24	25	26	27	28	29	30	31	32	33	34	35	36	37	38	39	40	41	42	43	44	45	46	47	48	49
Surface (m²)	100	100	100	100	100	100	100	100	100	100	100	100	100	100	100	100	100	100	100	100	100	100	100	100	100	100	100	100	100	100	100	100	100	100	100	100	100	100	100	100	100	100	100	100	100	100	100	100	100
Slope (°)	25	20	35	32	42	32	32	45	40	10	7	38	39	44	18	33	20	23	9	22	31	23	30	40	18	33	30	25	30	35	27	28	26	34	25	28	25	25	26	28	18	28	30	28	28	33	33	36	5
Exposure (°)	1	355	300	350	8	83	216	250	217	98	200	40	166	196	174	151	187	198	206	177	174	207	174	175	358	38	350	33	353	346	300	244	271	230	217	190	90	54	132	40	177	48	28	23	50	344	29	10	243
Elevation (m a.sl.)	785	770	770	775	795	775	1280	1275	1240	1255	1285	1280	1055	1045	1010	1065	1085	1065	1185	1195	1195	1200	1210	1265	1115	1090	1005	1130	1130	990	1175	1205	1190	1265	1300	1305	1105	1090	1095	1070	1085	1090	1040	1040	1065	1025	1020	1015	1075
Alive trees coverage (%)	85	80	80	95	100	100	100	100	85	100	100	95	95	95	95	95	100	100	95	95	90	95	95	95	90	95	80	95	95	95	95	95	95	100	100	100	50	50	70	95	100	100	70	70	60	95	95	95	70
Dead trees coverage (%)	100	85	100	0	0	0	65	100	100	0	0	0	100	100	100	0	0	0	100	100	100	0	0	0	100	90	90	0	0	0	95	95	95	0	0	0	100	100	95	0	0	15	60	85	90	0	0	0	85
Shrubs coverage (%)	95	95	95	5	1	1	1	5	60	40	20	25	30	1	1	0	0	0	1	10	25	<1	1	<1	1	40	40	<1	<1	1	5	1	50	<1	0	0	95	95	50	15	1	1	40	70	90	2	1	5	50
Grass coverage (%)	5	1	5	1	15	1	1	10	30	1	20	70	80	70	50	0.5	0.5	0.5	70	80	20	15	10	1	40	70	50	40	30	25	1	5	5	<1	<1	<1	<1	1	40	60	<1	<1	60	30	10	95	90	85	50
Litter coverage (%)	0	0	0	95	15	95	30	75	1	40	50	10	5	30	50	95	95	95	30	5	15	70	50	30	20	0	0	20	30	10	90	95	95	95	99	99	0	0	5	30	99	98	0	0	0	2	0	5	1
Mosses coverage (%)	0	0	0	1	10	1	70	25	10	60	30	30	1	1	1	1	1	1	5	5	15	15	50	70	40	50	10	40	40	5	1	1	<1	1	1	1	0	0	5	1	1	1	1	<1	<1	5	10	10	0
Max height of trees (m)	25	25	25	25	25	30	15	30	25	17	15	25	25	18	15	22	20	20	15	25	25	20	20	25	25	25	25	25	25	25	30	25	25	25	25	25	25	25	15	30	30	15	15	25	25	30	30	25	10
Max height of shrubs (m)	1.5	2.5	1.5	0.5	0.5	1.5	0.3	0.5	2	0.2	0.4	2	2	1	0.4	0	0	0	0.2	1.5	1	0.2	2	0.2	0.5	1.5	1.5	0.2	0.15	0.15	1	2	2	2	0	0	2.5	4	1	0.5	0.2	0.3	1.2	1.5	2	0.3	1	1.5	1
Max height of grass (m)	0.5	0.7	0.8	0.5	0.3	0.3	0.3	0.4	0.5	0.2	0.3	0.4	1	1	1	0.5	0.3	0.3	0.2	0.5	0.8	0.2	0.5	0.3	0.5	1	1	0.3	0.3	0.2	0.3	0.4	0.4	0.2	0.2	0.2	1	1	0.5	0.5	0.2	0.4	0.6	1	1	0.4	0.5	0.4	1
Abies alba Mill.								+				+																			r		r	+	r	r
Acer pseudoplatanus L.								r						+						+	r																							+	+			+	+
Aegopodium podagraria L.																																													+	+		+
Agrostis gigantea Roth.
Agrostis schraderiana Bech.																									r	r	+	r	r	r
Ajuga reptans L.
Alnus incana (L.) Moench
Anemonoides nemorosa L.						+
Anthoxanthum odoratum L.														r	r																								r
Aposeris foetida (L.) Less.																																											+
Aqilegia atrata W.D.J.Koch																																											+	+
Arctostaphylos uva-ursi L.											+	+							+																					+
Aruncus dioicus (Walter) Fernald			+		+																					+				r
Asperula taurina L.
Asplenium trichomanes L.																											r															r	+	r		r	r
Astrantia major L.																																												+
Athyrium filix-femina (L) Roth			+	+	+	+			+																+	1	+										+	+	+	1		+	+	+		+		+
Avenella flexuosa L. Drejer																																							+
Betula pendula Roth		+	+				+				+		r							r	+						+										+	1	+										+
Buddleja davidii Franch			+										2	r	+																							+											+
Calamagostris villosa (Chaix.) J. F. Gmel.																										+
Calamagrostis varia (Schrad.) Host												+
Calluna vulgaris (L.) Hull																					+																+		+
Campanula trachelium L.																																																r
Cardamine impatiens L.		r		+																																												+
Carex Alba Scop.																																											+	+	+	3	3	2
Carex digitata L.					+	+										+																												+	+	+		+	+
Carex pilulifera L.								+		+	+										+
Carex sylvatica Huds.																																														+	+
Castanea sativa Mill.	1	2	1	+	1	+		r				r	+	+	+		r	r												+
Cerastium fontanum Baumg.																																												r
Cirsium arvense L.		+
Cirsium vulgare (Savi) Ten.																																																	r
Clematis vitalba L.	+	+											+	+
Convolvolus arvensis L.													r																																+
Corylus avellana L.		+	1			+		+	1		+	+			+				+	+			+				+	r		+	+	+					1	1	+	1					r	r	+	+	+
Cyclamen purpurascens Mill.					+																																						1	+	+	1	1	1
Cystopteris fragilis L.	r
Cytisus scoparius L. Link																															r	r	+				+
Dactylis glomerata L																											r																	+					+
Dactylorhiza maculata (L.) subsp. fuchsii (Druce) Hyl.
Daphne mezeurum L.																																														+	+
Deschampsia cespitosa (L.) Beauv.																																							+				+	+					2
Digitalis lutea L.																																											+	+
Dryopteris dilatata (Hoffm.) A. Gray		+					+			+									+						+	1	+	+															1	r
Dryopteris filix-mas (L.) Schott		+	+						+						+	+				+						+	+												+	+			r	+	+		+	+	+
Emylus repens (L.) Gould																																																	+
Epilobium montanum L.
Epipactis spp.																r		r
Erica carnea L.												+	r		+	+			+								+	+										1
Erigeron canadensis L.														+	+																									r
Eupatorium cannabinum L.													+
Euphorbia spp.																																								r
Fagus sylvatica L.	1	1	1		+		+	+	+			1																			4	2	3	1	1	2	1	+	r	r	3	+	+	+	1	2	1	2
Festuca heterophilla Lam.												+			+				+												r	r
Fragaria vesca L.		+	+						1											+	+																			+			1	1	+				+
Fraxinus excelsior L.						+			3			r	+	r						+	+	r				r																	1	2	1	+	1	1
Fraxinus ornus L.	+	+		+	+	+								+	+																															+
Galeopsis tetrahit L.							+					+							+		+					+																		+
Galium aparine L.		+																	+		1						+																	+					+
Galium sylvaticum L.																																															+	+
Gentiana asclepiadea L.																																r
Geranium robertianum L.		+											r	+	+					+							+													+			+	1	+		+	+	+
Geum urbanum L.																																											+						+
Gymnocarpium dryopteris (L.) Newman						+
Gymnocarpium robertianum (Hoffm.) Newman																						r				1												+	+						+	+		+
Hedera helix L.					+	+										r	r																							r
Helleborus niger L.																																											+	+	+	+	1	2
Hepatica nobilis Mill.					+	+																																					+	+		1	1	1
Hieracium murorum L.				+	+		+	1	2	+	+	1	+	r	+	+			1	+		r	+	+	f		1	+	+		r		+						+	+		+	+	+		+
Hippocrepis emerus Mill.						r
Holcus lanatus L.
Humulus lupulus L.		r
Huperzia selago (L.) Bernh.									+			r																										+
Ilex aquifolium L.																																								r
Impatiens noli-tangere L.
Impatiens parviflora DC.																																																	+
Imperatoria ostruthium L.																										+
Juglans regia L.	+	r											r								+				+					r
Laburnum alpinum (Mill.) Bercht. & J.Presl							r																		r
Lactuca sativa L. subsp. serriola (L.) Galasso, Banfi, Bartolucci & Ardenghi														+																										+
Lamium galeobdolon L.						+																				+																		+	+	+	+	1
Lamium purpureum L.																																																	+
Larix decidua Mill.									1	1	+	+													1	1		1	1	1					+	r	+						2	+		+	+	+	r
Lathyrus pratensis L.																																												+	+
Lathyrus vernus (L.) Bernh.									r																																		+				+	+
Lolium perenne L.																																																	+
Lonicera nigra L.																										+
Lonicera xyolsteum L.						+																																										+
Luzula nivea (L.) D.C.	+		+	+	+			+	1	+		2							+	+	1	+	1	+	1	1	1	1	+	+	+	1	+					+	2	+	+	+	+		+	1	2	1
Luzula sylvatica subsp. sieberi (Tausch) Cif. & Giacom.								+											+							+													2									+
Lysimachia vulgaris L.																																						r
Maianthemum bifolium (L.) F.W.Schmidt				r	+			+	1	1	1	+							+	1		+	+	+		1	+			1	+		+		r					+	+	+			+	1	1	+
Melampyrum pratense L.												r
Melica nutans L.																																											+
Moehringia muscosa L.																																															+
Moehringia trinervia (L.) Clairv.																																							r
Molinia arundinacea Schrank															+
Mosses		+		+	2	+	4	2	2	4	3	3	+	+	1	+	+	+	1	1	2	2	3	4	2	3	2	2	3	1	+	+	+	+	+	+			1	+	+	+	+	r	+	1	2	2
Mycelis muralis (L.) Dumort.		+	+	+			+	+	+				+	+	+	r											+			r													+	+	+	r	+
Orthilia secunda L. House
Ostria carpinifolia Scop.																											+																	r	+	+
Oxalis acetosella L.		1	+	+		+	+	+	2	+	1	+			+	+			4	4	1	2			4	4	2	3	3	1								+	r	+				r		2	1	2	+
Paris quadrifolia L.
Petasites albus (L.) Gaertn.																											+
Phegopteris connectivis (Michx.) Watt			r						+			+														1	+											+
Phleum pratense L.																																																	r
Phyteuma betonicifolium Vill.								r	+			+																																			+
Phyteuma scheuchzeri			r					+					r		+	r																								r
Picea abies L. (ALIVE)	r	+	r	5	5	5	1	+	1	5	5	5				5	5	5	+		r	5	5	5	+	1	2	5	5	5	+			5	5	4	r		r	5	4	5	+	+		4	5	4	1
Picea abies L. (DIED)	5	4	5				5	5	5				5	5	5				5	5	5				5	4	4				5	5	5				3	3	3				4	4	3				4
Pinus sylvestris L.		r
Plantago major L.																																												+
Poa annua L.																																																	r
Poa trivialis L.
Polygala chamaebuxus L.										+		+
Polygonatum verticillatum (L.) All.									+																					+
Polypodium vulgare L.			+				+	+	+	+	+	+	+	+	+			r	+		+	+	+	+		+		r	+	+													+				+
Polystichum lonchitis (L.) Roth.																																														+
Populus tremula L.								+																													+	+
Potentilla erecta (L.) Raeusch.																																							+
Prenanthes purpurea L.	+				+																					1	2	1	+			r		r		r	r										r	+
Prunella grandiflora (L.) Scholler																																												+
Prunus avium L.														r	+
Pteridium aquilinum (L.) Kuhn							+				+	+		+			+	+					+									r	r
Quercus petraea (Matt.) Liebl.	r				+
Robinia pseudoacacia L.			+
Rosa spp.												r
Rubus idaeus L.	3	4	3	+				+	2				1	+	2				1	1	2				+		2				+						1	+	1	+			3	4	3	+			2
Rubus ulmifolius Schott	3		3		+	+							r							+	+						1				1	+	+			r	5	5	3	1			+	1	+	+			1
Salix caprea L.							+		+												+																1	3	+					r
Salix purpurea L.																																																	r
Salvia glutinosa L.																											+																2	+	+	+	+
Sambucus nigra L.		+											+	+	+					+	2					+					+		+												1				1
Sambucus racemosa L.																											+										1	1	+	+		+
Sanguisorba dodecandra Moretti																																																	+
Saxifraga cuneifolia L.																										+																				+	+	+
Saxifraga oppositifolia L.																												+															1	1
Senecio inaequidens DC.													4	4	3						+
Senecio ovatus (G.Gaertn., B.Mey. & Scherb.) Willd. subsp. ovatus			+					+																		+	r																				r
Senecio pterophorus NC.								r
Sesleria caerulea (L.) Ard.																																												+	+	+	+
Silene dioica (L.) Clairv.																																																	+
Silene rupestris L.								+	+												+
Silene vulgaris (Moench) Garcke															r
Solanum dulcamara L.			+																		+																						+	+
Solidago virgaurea L.								+	1	+		+			+				+			+			+	+	+					r							+	+								+
Sorbus aria (L.) Crantz																																											r
Sorbus aucuparia L.	+		+	+	+	+	+	+	+	+	+	+			+	+			+	+	r	r			1	1	+	r		+		+	+		+			+	+	+	+	+	+	+	+	+	r	+
Stellaria media (L.) Vill.																																	r
Stellaria nemorum L.														r											r
Tanacetum corymbosum (L.) Sch.Bip.														+
Taraxacum officinale (Group)		r											+		+				r	r	r																						+	r
Taxus baccata L.																																													+
Tilia cordata Mill.						+
Trifolium pratense L. subsp. pratense																																																	+
Trifolium repens L.																																																	+
Tussilago farfara L.																																											+	+
Urtica dioica L.			+																r	r	+																		+				+	1					3
Vaccinium myrtillus L.					+	r	+	1	1	3	1	+							+	+			1	+	+	+	1			+	1	+							+	1	+	+
Valeriana tripteris L.
Veronica officinalis L.				+				+	+		+				+	1				+				+	+			+				r											+						+
Veronica urticifolia Jacq.																+										+	+	+																			+
Vinca minor L.																															+	r
Vincetoxicum hirundinaria Medik.						r
Viola biflora L.												r
Viola spp.			r	r		r			r																			+			r	r	r							+
[truncated: 17 more columns]
