# Supplementary material for: Ecology, floristic-vegetational features and future perspectives of spruce forests affected by Ips typographus: insights from the Southern Alps
Source: Research Square preprint supplement (doi:10.21203/rs.3.rs-5878691/v1), 2025-01-28
Supplement: Supplementary file 3 [file affc8f0e515aa71aa88af32e.xlsx]

## Sheet: Foglio1
Bioclimatic variable code	Percent contribution (%)	Permutation importance (%)
BIO9	80.1	77.6
BIO1	15.8	0
BIO13	3.6	0
BIO3	0.4	16.7
BIO6	0.1	5.7
BIO14	0	0
BIO18	0	0
BIO17	0	0
BIO16	0	0
BIO15	0	0
BIO8	0	0
BIO7	0	0
BIO5	0	0
BIO4	0	0
BIO2	0	0
BIO19	0	0
BIO12	0	0
BIO11	0	0
BIO10	0	0
